# Supplementary material
Source: PubMed Central journal article supplement (PMC164621)

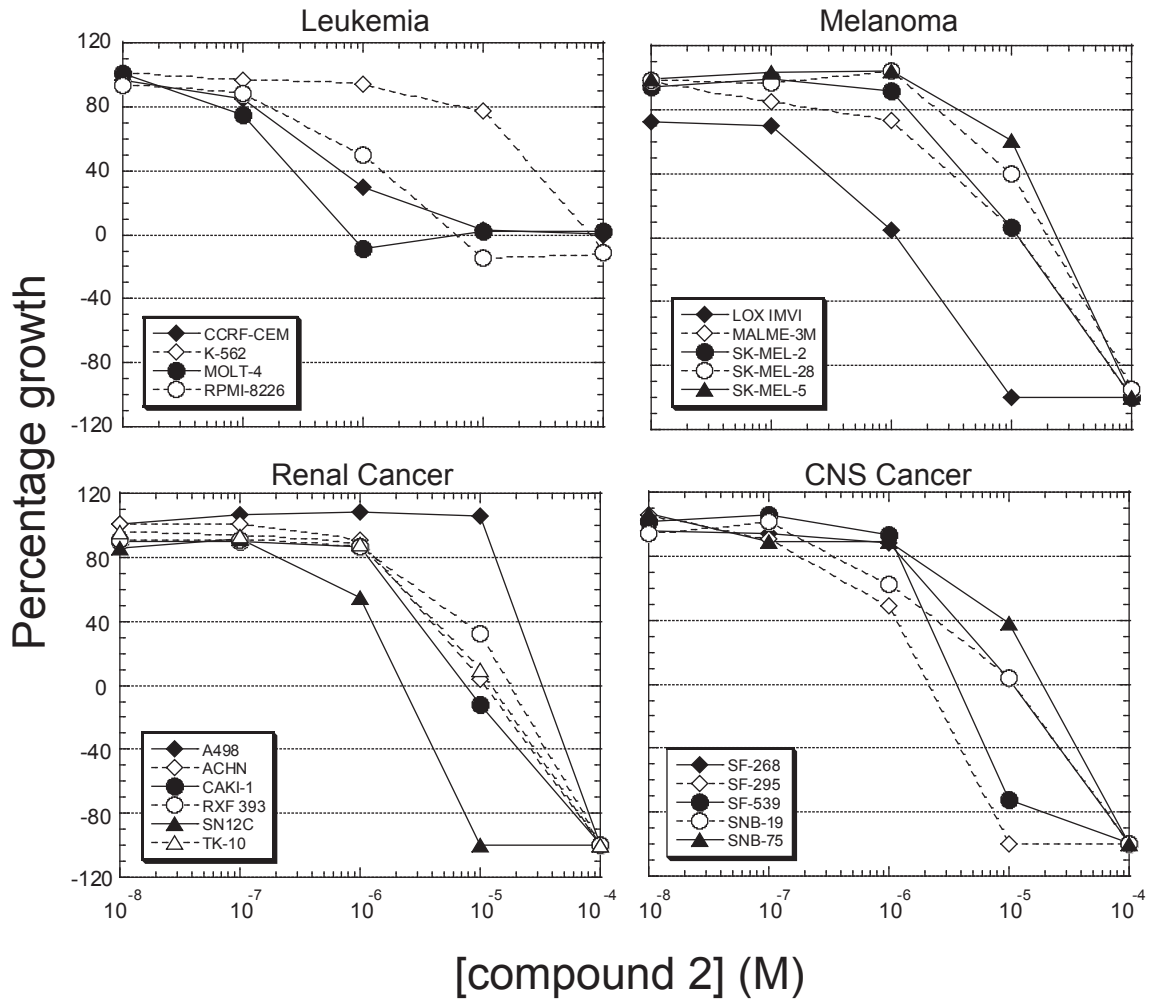

Supplement: pnas_1031631100_2.pdf [file pnas_1031631100_2.pdf]

**A**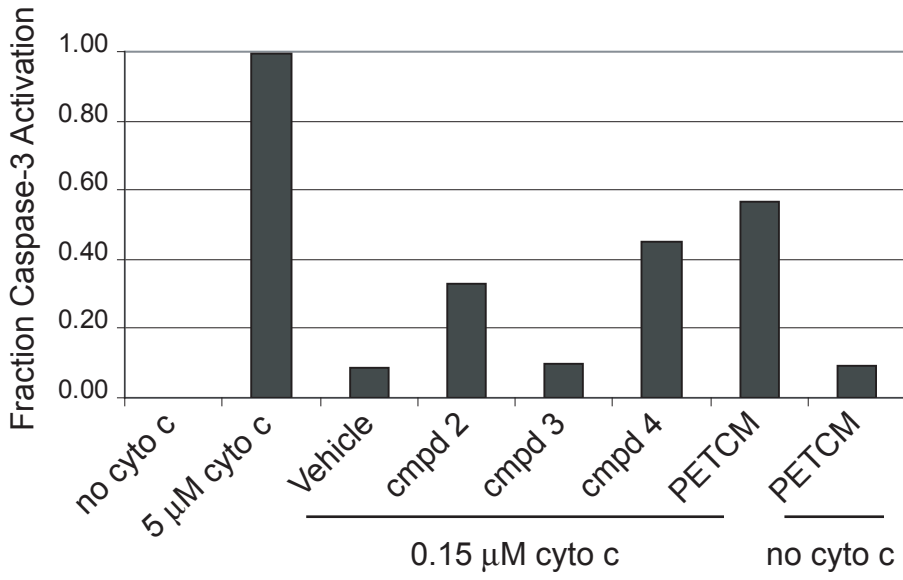**B**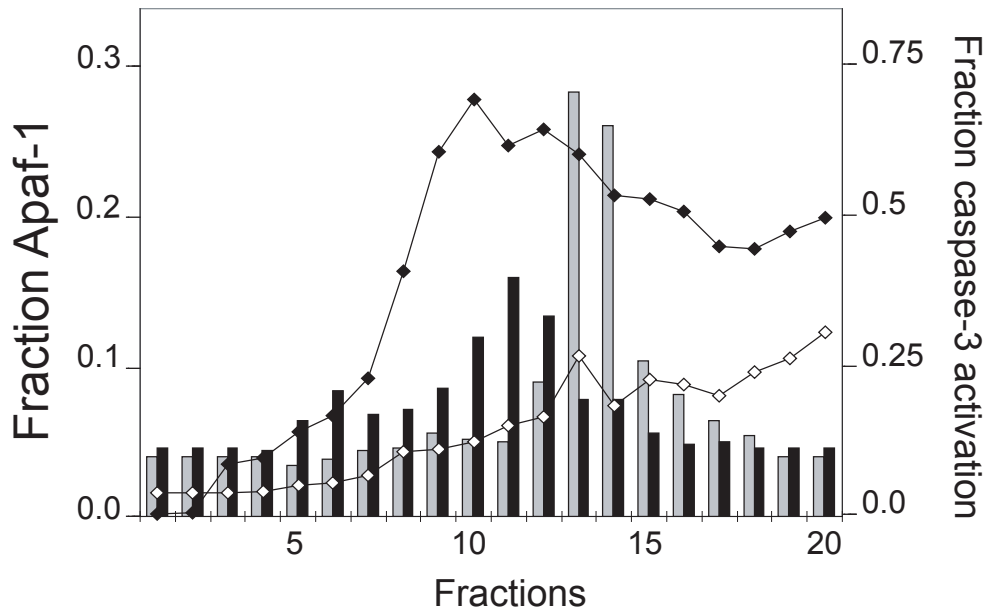

Supplement: pnas_1031631100_4.pdf [file pnas_1031631100_4.pdf]
